# Supplementary material for: Cell-Free HPV-DNA as a Biomarker for Oropharyngeal Squamous Cell Carcinoma—A Step Towards Personalized Medicine?
Source: PubMed Central journal article supplement (PMC7602702; doi:10.3390/cancers12102997), 2020-10-15
Supplement: cancers-12-02997-s001.pdf [file cancers-12-02997-s001.pdf]

## Supplementary Materials: Cell-free HPV-DNA as Biomarker for Oropharyngeal Squamous Cell Carcinoma—A Step towards Personalized Medicine?

Nora Wuerdemann, Rishabh Jain, Anne Adams, Ernst-Jan M. Speel, Steffen Wagner, Simon A. Joosse and Jens P. Klussmann

**Table S1.** Extra information on studies included in the review and meta-analysis.

| Study                    | Year | Target Gene                                                                | Volume | Treatment                 | HPV+ Tissue Status                                                 | Concentration of cfHPV-DNA (at first Diagnosis)                                                                          | Tube                  | Follow up Time |
|--------------------------|------|----------------------------------------------------------------------------|--------|---------------------------|--------------------------------------------------------------------|--------------------------------------------------------------------------------------------------------------------------|-----------------------|----------------|
| Cao et al. [22]#**       | 2012 | E6, E7, L1                                                                 | NR     | Chemoradiotherapy         | p16 staining<br>PCR/ HPV In-situ hybridization                     | Median = 222<br>copies/ml (0–5,500<br>copies/ml)                                                                         | NR                    | 12–22 months   |
| Ahn et al. [23]#**       | 2014 | E6, E7                                                                     | NR     | Surgery/Chemoradiotherapy | HPV In-situ hybridization<br>qPCR                                  | NR                                                                                                                       | Citrate               | 49 months      |
| Dahlstrom et al. [24]#** | 2015 | E6/E7                                                                      | 500 µL | Chemoradiotherapy         | PCR                                                                | <8000 copies/mL<br>E6 Median = 83<br>copies/mL<br>E7 Median = 43<br>copies/mL                                            | NR                    | 67 months      |
| Wang et al. [25]#        | 2015 | E7                                                                         | 6 mL   | Surgery/Chemoradiotherapy | PCR                                                                | NR                                                                                                                       | NR                    | 12 months      |
| Kuhs et al. [26]#        | 2017 | Antibody: HPV16- L1, E1, E2,E4, E6, E7<br>HPV6,11,18,31,33,45,58- E6       | NR     | Surgery/Chemoradiotherapy | PCR (DNA/RNA testing)<br>p16 staining<br>HPV In-situ hybridization | NR                                                                                                                       | NR                    | 307 days       |
| Lee et al. [27]#**       | 2017 | 39-amplicon single pool panel covering 34 distinct regions of HPV16 genome | 5 mL   | Chemoradiotherapy         | p16 staining<br>qPCR                                               | NR                                                                                                                       | NR                    | 12 weeks       |
| Chera et al. [28]#       | 2019 | E7                                                                         | 2–5 mL | Chemoradiotherapy         | p16 staining                                                       | HPV16<br>n = 84<br>Median = 419<br>copies/mL(8–<br>22,579 copies/mL)<br>High risk HPV<br>strain<br>n = 8<br>Median = 124 | BCT tubes<br>(Streck) | 16.5 months    |

|                       |      |        |        |                                  |                                             |                                                                                                        |                                                   |                                                                |
|-----------------------|------|--------|--------|----------------------------------|---------------------------------------------|--------------------------------------------------------------------------------------------------------|---------------------------------------------------|----------------------------------------------------------------|
|                       |      |        |        |                                  |                                             | copies/mL (71–15,829 copies/mL)                                                                        |                                                   |                                                                |
| Damerla et al. [29]#  | 2019 | E6,E7  | 4–5 mL | Surgery/Chemoradiotherapy        | HPV In-situ hybridization p16 staining      | Mean= 1,218 copies/mL (0 to 13,163 copies/mL)                                                          | BCT tubes (Streck) or BD vacutainer K2 EDTA tubes | NR                                                             |
| Nguyen et al. [30]#   | 2020 | E7     | NR     | Chemoradiotherapy/ Immunotherapy | p16 staining                                | Median= 880 copies/mL (11–161,680 copies/mL)                                                           | EDTA                                              | 20 months                                                      |
| Reder et al. [31]#    | 2020 | E6,E7  | 500 µL | Surgery/Chemoradiotherapy        | p16 staining PCR                            | E6 Median= 9,283 copies/mL (0–79,850 copies/mL)<br>E7 Median = 12,699 copies/ml (0–1,50,838 copies/ml) | BCT tubes (Streck)                                | NR                                                             |
| Mazurek et al. [32]   | 2016 | E6,E7  | 1 mL   | Chemoradiotherapy                | NR                                          | OPSCC 9.60 ± 6.23 ng/ml > other<br>HNSCC 7.67 ± 4.44 ng/ml                                             | NR                                                | NR                                                             |
| Jeannot et al. [33]   | 2016 | E7     | 200µL  | NR                               | NR                                          | 4,605 copies/ml                                                                                        | NR                                                | NR                                                             |
| Rutkowski et al. [34] | 2017 | E6,E7  | 1 mL   | Chemoradiotherapy                | NR                                          | NR                                                                                                     | K <sub>3</sub> EDTA                               | Follow up time is given separately for each of the 55 patients |
| Hanna et al. [35]     | 2018 | E7     | NR     | Cytotoxic/ Immunotherapy         | p16 staining PCR/ HPV In-situ hybridization | Cutoff value = 5–10 copies/ml                                                                          | NR                                                | 133 days                                                       |
| Veyer et al. [36]     | 2019 | E6     | 200µL  | NR                               | p16 staining/HPV16 molecular detection      | Median = 319.4 copies/ml (0–1,47,416.7 copies/ml)                                                      | EDTA                                              | 2.84 years                                                     |
| Chera et al. [37]**   | 2020 | E6, E7 | 2–5 mL | Chemoradiotherapy                | p16 staining                                | NR                                                                                                     | BCT tubes (Streck)                                | 23 months                                                      |

**Abbreviations:** NR- not reported, qPCR- Quantitative PCR, BCT- Blood collection tube, OPSCC- Oropharyngeal squamous cell carcinoma. # studies included in meta-analysis at first diagnosis and \*\* studies included in meta-analysis during follow-up.

Table S2. Quality assessment of the studies included in meta-analysis.

| Study                  | Risk of Bias      |            |                    |                 | Applicability Concerns |            |                    |
|------------------------|-------------------|------------|--------------------|-----------------|------------------------|------------|--------------------|
|                        | Patient Selection | Index Text | Reference Standard | Flow and Timing | Patient Selection      | Index Text | Reference Standard |
| Cao et al. [22]#       | L                 | L          | L                  | L               | L                      | L          | L                  |
| Ahn et al. [23]#       | L                 | L          | L                  | L               | L                      | L          | L                  |
| Dahlstrom et al. [24]# | L                 | L          | L                  | L               | L                      | L          | L                  |
| Wang et al. [25]#      | L                 | L          | L                  | L               | L                      | L          | L                  |
| Kuhs et al. [26]#      | L                 | L          | L                  | L               | L                      | L          | L                  |
| Lee et al. [27]#       | L                 | L          | L                  | L               | L                      | L          | L                  |
| Chera et al. [28]#     | L                 | L          | L                  | L               | L                      | L          | L                  |
| Damerla et al. [29]#   | L                 | L          | L                  | L               | L                      | L          | L                  |
| Nguyen et al. [30]#    | H                 | L          | L                  | L               | H                      | L          | L                  |
| Reder et al. [31]#     | L                 | L          | L                  | L               | L                      | L          | L                  |

**Abbreviations:** L- Low risk of bias, H- High risk of bias. # studies included in meta-analysis at first diagnosis. # studies included in meta-analysis at first diagnosis.

**Table S3.** Primers and probes used in the different studies of the review and meta-analysis.

| Studies                     | HPV-cfDNA Primers                                                                                                                                                                               | Probes                                                                                                                                                                                         | Method                      |
|-----------------------------|-------------------------------------------------------------------------------------------------------------------------------------------------------------------------------------------------|------------------------------------------------------------------------------------------------------------------------------------------------------------------------------------------------|-----------------------------|
| Cao et al.<br>[22]###       | HPV16 E6/7                                                                                                                                                                                      | HPV16 E6/E7                                                                                                                                                                                    | qPCR                        |
|                             | F- 5'-GAACCGAAACCGGTTAGTATAA-3'                                                                                                                                                                 | 5'-FAM-AGGACCCACAGGAGCGACCC-BHQ1 -3'                                                                                                                                                           |                             |
|                             | R- 5'-ATGTATAGTTGTTTGCAGCTCTGT-3'                                                                                                                                                               | HPV18 E6/E7                                                                                                                                                                                    |                             |
|                             | HPV18 E6/E7                                                                                                                                                                                     | 5'-CO560-                                                                                                                                                                                      |                             |
|                             | F- 5'- GGACCGAAAACGGTGTATATAA-3'                                                                                                                                                                | ATGTGAGAAAACACACCACAATACTATGGCGCG-BHQ1                                                                                                                                                         |                             |
|                             | R- 5'- CAGTGAAGTGTTTCAGTTCGGT-3'                                                                                                                                                                | -3'                                                                                                                                                                                            |                             |
| Ahn et al.<br>[23]###       | HPV L1                                                                                                                                                                                          |                                                                                                                                                                                                | qPCR                        |
|                             | F- 5'- TTTGTTACTGTGGTAGATACATC-3'                                                                                                                                                               |                                                                                                                                                                                                |                             |
|                             | R- 5'- GAAAAATAAACTGTAATCATATTC-3'                                                                                                                                                              |                                                                                                                                                                                                |                             |
|                             | HPV E6                                                                                                                                                                                          | HPV E6                                                                                                                                                                                         |                             |
|                             | F- 5'-TCAGGACCCACAGGAGCG-3'                                                                                                                                                                     | 5'-FAM-                                                                                                                                                                                        |                             |
|                             | R- 5'-CCTCACGTGCGCAGTAACTGTTG-3'                                                                                                                                                                | CCCAGAAAAGTTACCACAGTTATGCACAGAGCT-TAMRA -3'                                                                                                                                                    |                             |
| Dahlstrom et al.<br>[24]### | HPV E7                                                                                                                                                                                          | HPV E7                                                                                                                                                                                         | qPCR                        |
|                             | F- 5'-CCGGACAGAGCCCATTACAA-3'                                                                                                                                                                   |                                                                                                                                                                                                |                             |
|                             | R- 5'-CGAATGTCTACGTGTGTGCTTTG-3'                                                                                                                                                                | 5'-FAM-CGCACAACCGAAGCGTAGAGTCACACT-TAMRA -3'                                                                                                                                                   |                             |
|                             | Not provided in the literature                                                                                                                                                                  | Not provided in the literature                                                                                                                                                                 |                             |
| Wang et al.<br>[25]#        | The primers used in this article was referenced to the study- Vogelstein, B., & Kinzler, K. W. (1999). Digital pcr. <i>Proceedings of the National Academy of Sciences</i> , 96(16), 9236-9241. | The probes used in this article was referenced to the study- Vogelstein, B., & Kinzler, K. W. (1999). Digital pcr. <i>Proceedings of the National Academy of Sciences</i> , 96(16), 9236-9241. | ddPCR                       |
| Kuhs et al. [26]#           | -                                                                                                                                                                                               | -                                                                                                                                                                                              | Multiplex serologic testing |
| Lee et al.<br>[27]###       | -                                                                                                                                                                                               | -                                                                                                                                                                                              | HPV16-detect                |
| Chera et al.<br>[28]#       | HPV16                                                                                                                                                                                           | HPV16                                                                                                                                                                                          | ddPCR                       |
|                             | F- 5'- TGA CTCTACGCTTCGGTTG -3'                                                                                                                                                                 | 5'-FAM- CGTACAAAGCACACACGTAGACATTCGTAC-                                                                                                                                                        |                             |
|                             | R- 5'- GCCCATTAACAGGTCTTCC -3'                                                                                                                                                                  | ZEN -3'                                                                                                                                                                                        |                             |
|                             | HPV18                                                                                                                                                                                           | HPV18                                                                                                                                                                                          |                             |

|                                       |                                                                                                                                                                          |                                                                                                                               |                                    |
|---------------------------------------|--------------------------------------------------------------------------------------------------------------------------------------------------------------------------|-------------------------------------------------------------------------------------------------------------------------------|------------------------------------|
|                                       | F- 5'- TGAAGCCAGAATTGAGCTAG -3'<br>R- 5'- AGGACAGGGTGTTCAGAA -3'<br>HPV31                                                                                                | 5'-LNA- CAGACGACCTTCG-HEX -3'<br><br>HPV31                                                                                    |                                    |
|                                       | F- 5'- AGCACACAAGTAGATATTCGC -3'<br>R- 5'- TAGTAGAACAGTTGGGGCA -3'<br>HPV33                                                                                              | 5'-LNA- TAACAGCTCTTGC -HEX-3'<br><br>HPV33                                                                                    |                                    |
|                                       | F- 5'- TAACACCACAGTTCGTTTATGT -3'<br>R- 5'- ACAATATTCAGTGTGCCATA -3'<br>HPV35                                                                                            | 5'-LNA- TGACCTACG AACCC-HEX -3'<br><br>HPV35                                                                                  |                                    |
|                                       | F- 5'- TGAGGCGACACTACGTC -3'<br>R- 5'- GTGCCATTAATAAATCTTCCAA -3'                                                                                                        | 5'-LNA- AGAGCACACACAT-HEX -3'                                                                                                 |                                    |
| <b>Damerla et al.</b><br><b>[29]#</b> | HPV16<br>F- 5'- TATGCACAGAGCTGCAAACA -3'<br>R- 5'- GCAAAGTCATATACCTCACGTC -3'<br>HPV33                                                                                   | HPV16<br>5'-FAM- TGTGTGTACTGCAAGCAACAGTTACTG –<br>lowaBlack -3'<br>HPV33                                                      | ddPCR<br>qPCR                      |
|                                       | F- 5'- CCACAGTTCGTTTATGTGTC -3'<br>R- 5'- TGCCATAAGTAGTTGCTGT -3'                                                                                                        | 5'-FAM- AGTACAGCAAGTGACCTACGAACCA –<br>lowaBlack -3'                                                                          |                                    |
| <b>Nguyen et al.</b><br><b>[30]#</b>  | Same as that of Jeannot et al.<br>HPV16<br>F- 5'- TCCAGCTGGACAAGCAGAAC -3'<br>R- 5'- CACAACCGAAGCGTAGAGTC -3'                                                            | Same as that of Jeannot et al.<br>HPV16<br>5'-FAM- ACAGAGCCCATTACAAT –Taqman probe -3'                                        | ddPCR                              |
| <b>Reder et al.</b><br><b>[31]#</b>   | HPV E6<br>F- 5'- GCACCAAAGAGAAGTGAATG -3'<br>R- 5'- GTTGCAGCTCTGTGCATAACTG -3'<br>HPV E7<br>F- 5'- CAGCTCAGAGGAGGAGGATG -3'<br>R- 5'- GTAATGGCTCTGTCCGGT -3'             | HPV E6<br>5'-JOE- AGGACCCACAGGAGCGACCCAGAAAGTTAC-<br>BHQ1 -3'<br>HPV E7<br>5'-FAM- AGATGGTCCAGCTGGACAAGCAG<br>AACCGG-BHQ1 -3' | qPCR                               |
| <b>Mazurek et al.</b><br><b>[32]</b>  | HPV16<br>F- 5'- TTGCAGATCATCAAGAACACGTAGA -3'<br>R- 5'- CAGTAGAGATCAGTTGTCTCTGGTTGC -3'<br><br>HPV18<br>F- 5'- AGAGGCCAGTGCCATTCGT -3'<br>R- 5'- GTTCTCTGCGTCGTGGAGT -3' | HPV16<br>5'-FAM-<br>AATCATGCATGGAGATACACCTACATTGCATGA-<br>TAMRA -3'<br><br>HPV18<br>5'-FAM- TCCTGTCGTGCTCGGTTGCAGC -TAMRA-3'  | TaqMan based TERT<br>amplification |

|                                 |                                                                                |                                                            |                                 |
|---------------------------------|--------------------------------------------------------------------------------|------------------------------------------------------------|---------------------------------|
| <b>Jeannot et al.</b><br>[33]   | HPV16                                                                          | HPV16                                                      | ddPCR                           |
|                                 | F- 5'- TCCAGCTGGACAAGCAGAAC -3'<br>R- 5'- CACAACCGAAGCGTAGAGTC -3'             | 5'-FAM- ACAGAGCCCATTACAAT –Taqman probe -3'                | qPCR                            |
|                                 | HPV18                                                                          | HPV18                                                      |                                 |
|                                 | F- 5'- AACATTACCAGCCCGACGA -3'<br>R- 5'- TCGTCTGCTGAGCTTTCTAC -3'              | 5'-FAM- AACACAACGTCACACAA –Taqman probe -3'                |                                 |
| <b>Rutkowski et al.</b><br>[34] | Same as that of Mazurek et al.                                                 | Same as that of Mazurek et al.                             | TaqMan based TERT amplification |
|                                 | HPV16                                                                          | HPV16                                                      |                                 |
|                                 | F- 5'- TTGCAGATCATCAAGAACACGTAGA -3'<br>R- 5'- CAGTAGAGATCAGTTGTCTCTGGTTGC -3' | 5'-FAM-<br>AATCATGCATGGAGATACACCTACATTGCATGA-<br>TAMRA -3' |                                 |
|                                 | HPV18                                                                          | HPV18                                                      |                                 |
|                                 | F- 5'- AGAGGCCAGTGCCATTCGT -3'<br>R- 5'- GTTCTCTGCGTCGTTGGAGT -3'              | 5'-FAM- TCCTGTCGTGCTCGGTTGCAGC -TAMRA-3'                   |                                 |
|                                 | <b>Hanna et al.</b><br>[35]                                                    | HPV16                                                      | ddPCR                           |
|                                 | F- 5'- GCTCAGAGGAGGAGGATGAAATAGA -3'<br>R- 5'- GAGTCACACTTGCAACAAAAGGTT -3'    | 5'-FAM- CCGGACAGAGCCCATTACAAT –NFQ -3'                     |                                 |
|                                 | HPV18                                                                          | HPV18                                                      |                                 |
|                                 | F- 5'- AGGAAGAAAACGATGAAATAGATGGAGTT -3'<br>R- 5'- GGCTTCACACTTACAACACATAC -3' | 5'-FAM- ACCAGCCCGACGAGCCGA –NFQ -3'                        |                                 |
|                                 | HPV31                                                                          | HPV31                                                      |                                 |
|                                 | F- 5'- CAGCTCAGATGAGGAGGATGTC -3'<br>R- 5'- ACTTACACTGACAACAAAAGGTAACGA -3'    | 5'-FAM- AACCGGACACATCCAATTAC -NFQ-3'                       |                                 |
|                                 | HPV33                                                                          | HPV33                                                      |                                 |
|                                 | F- 5'- CGGCCAGATGGACAAGCA -3'<br>R- 5'- TGCTGTACTGTTGACACATAAACGA -3'          | 5'-FAM- CCGACGAGCCGAACCACAG -NFQ -3'                       |                                 |
|                                 | HPV45                                                                          | HPV45                                                      |                                 |
|                                 | F- 5'- CAGATGGAGTTAGTCATGCACAAC -3'<br>R- 5'- CCGTCACACTTACAACATACACACA -3'    |                                                            |                                 |
|                                 | <b>Veyer et al.</b> [36]                                                       | Not provided in the literature                             | ddPCR                           |
| <b>Chera et al.</b> [37]        | Same as that of Chera et al.                                                   | Same as that of Chera et al.                               | ddPCR                           |
|                                 | **<br>HPV16                                                                    | HPV16                                                      |                                 |

---

|                          |                                 |
|--------------------------|---------------------------------|
| F- 5'- TGA               | 5'-FAM-                         |
| CTCTACGCTTCGGTTG -3'     | CGTACAAAGCACACACG               |
| R- 5'- GCCC              | TAGACATTCGTAC-                  |
| ATTAAACAGGTCTTCC -3'     | ZEN -3'                         |
| HPV18                    | HPV18                           |
| F- 5'- TGA               | 5'-LNA-                         |
| AAGCCAGAATTGAGCTAG -3'   | CAGACGACCTTCG-HEX -3'           |
| R- 5'- AGG               | HPV31                           |
| ACAGGGTGTTCAGAA -3'      | 5'-LNA- TAACAGCTCTTGC -HEX-3'   |
| HPV31                    | HPV33                           |
| F- 5'- AGC               | 5'-LNA- TGACCTACG AACCC-HEX -3' |
| CACACAAGTAGATATTCGC -3'  | HPV35                           |
| R- 5'- TAG               | 5'-LNA- AGAGCACACACAT-HEX -3'   |
| TAGAACAGTTGGGGCA -3'     |                                 |
| HPV33                    |                                 |
| F- 5'- TAA               |                                 |
| CACCACAGTTCGTTTATGT -3'  |                                 |
| R- 5'- ACA               |                                 |
| ATATTCAGTGTGCCATA -3'    |                                 |
| HPV35                    |                                 |
| F- 5'- TG                |                                 |
| AGGCGACACTACGTC -3'      |                                 |
| R- 5'- GT                |                                 |
| GCCCATTAATAAATCTTCAA -3' |                                 |

---

**Abbreviations:** NR- not reported, qPCR- Quantitative PCR, ddPCR- Droplet digital PCR. # studies included in meta-analysis at first diagnosis and \*\* studies included in meta-analysis during follow-up.

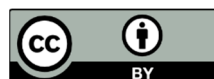

© 2020 by the authors. Licensee MDPI, Basel, Switzerland. This article is an open access article distributed under the terms and conditions of the Creative Commons Attribution (CC BY) license (<http://creativecommons.org/licenses/by/4.0/>).
